# Supplementary material for: Enabling reusability of plant phenomic datasets with MIAPPE 1.1
Source: PubMed Central journal article supplement (PMC7317793; doi:10.1111/nph.16544), 2020-04-25
Supplement: NPH-227-260-s002.pdf [file NPH-227-260-s002.pdf]

## New Phytologist Supporting Information

Article title: Enabling reusability of plant phenomic datasets with MIAPPE 1.1

### Authors:

Evangelia A. Papoutsoglou, Daniel Faria, Daniel Arend, Elizabeth Arnaud, Ioannis N. Athanasiadis, Inês Chaves, Frederik Coppens, Guillaume Cornut, Bruno V. Costa, Hanna Ćwiek-Kupczyńska, Bert Dreesbeke, Richard Finkers, Kristina Gruden, Astrid Junker, Graham J. King, Paweł Krajewski, Matthias Lange, Marie-Angélique Laporte, Céline Michotey, Markus Oppermann, Richard Ostler, Hendrik Poorter, Ricardo Ramírez-Gonzalez, Živa Ramšak Jochen C. Reif, Philippe Rocca-Serra, Susanna-Assunta Sansone, Uwe Scholz, François Tardieu, Cristóbal Uauy, Björn Usadel, Richard G.F. Visser, Stephan Weise, Paul J. Kersey, Célia M. Miguel, Anne-Françoise Adam-Blondon, Cyril Pommier

Article acceptance date: 24 February 2020.

Table S1. Detailed mapping between MIAPPE, ISA-Tab and BrAPI fields.

|        | MIAPPE                                 | ISA-Tab       |                                          |                                                                                                                 | BrAPI                |                    |                               |
|--------|----------------------------------------|---------------|------------------------------------------|-----------------------------------------------------------------------------------------------------------------|----------------------|--------------------|-------------------------------|
| line # | MIAPPE Check list                      | ISA-Tab File  | ISA-Tab Section (for Investigation file) | ISA-Tab Field                                                                                                   | BrAPI Call           | BrAPI Object(s)    | BrAPI Field(s)                |
| DM-1   | <b>Investigation</b>                   |               |                                          |                                                                                                                 |                      |                    |                               |
| DM-2   | Investigation unique ID                | Investigation | INVESTIGATION                            | Investigation Identifier                                                                                        | /trials/{trialDbId}  | None               | trialDbId                     |
| DM-3   | Investigation title                    | Investigation | INVESTIGATION                            | Investigation Title                                                                                             | /trials/{trialDbId}  | None               | trialName                     |
| DM-4   | Investigation description              | Investigation | INVESTIGATION                            | Investigation Description                                                                                       | /trials/{trialDbId}  | None               | trialDescription              |
| DM-5   | Submission date                        | Investigation | INVESTIGATION                            | Investigation Submission Date                                                                                   | /trials/{trialDbId}  | datasetAuthorships | submissionDate                |
| DM-6   | Public release date                    | Investigation | INVESTIGATION                            | Investigation Public Release Date                                                                               | /trials/{trialDbId}  | datasetAuthorships | publicReleaseDate             |
| DM-7   | License                                | Investigation | INVESTIGATION                            | Comment[License]                                                                                                | /trials/{trialDbId}  | datasetAuthorships | license                       |
| DM-8   | MIAPPE version                         | Investigation | INVESTIGATION                            | Comment[MIAPPE version]                                                                                         | <i>out of scope</i>  |                    |                               |
| DM-9   | Associated publication                 | Investigation | INVESTIGATION PUBLICATIONS               | Investigation Publication DOI                                                                                   | /trials/{trialDbId}  | publications       | publicationPUI                |
| DM-10  | <b>Study</b>                           |               |                                          |                                                                                                                 |                      |                    |                               |
| DM-11  | Study unique ID                        | Investigation | STUDY                                    | Study Identifier                                                                                                | /studies/{studyDbId} | None               | studyDbId                     |
| DM-12  | Study title                            | Investigation | STUDY                                    | Study Title                                                                                                     | /studies/{studyDbId} | None               | studyName                     |
| DM-13  | Study description                      | Investigation | STUDY                                    | Study Description                                                                                               | /studies/{studyDbId} | None               | studyDescription              |
| DM-14  | Start date of study                    | Investigation | STUDY                                    | Comment[Study Start Date]                                                                                       | /studies/{studyDbId} | None               | startDate                     |
| DM-15  | End date of study                      | Investigation | STUDY                                    | Comment[Study End Date]                                                                                         | /studies/{studyDbId} | None               | endDate                       |
| DM-16  | Contact institution                    | Investigation | STUDY                                    | Comment[Study Contact Institution]                                                                              | /studies/{studyDbId} | None               | instituteName                 |
| DM-17  | Geographic location (country)          | Investigation | STUDY                                    | Comment[Study Country]                                                                                          | /studies/{studyDbId} | location           | countryName / countryCode     |
| DM-18  | Experimental site name                 | Investigation | STUDY                                    | Comment[Study Experimental Site]                                                                                | /studies/{studyDbId} | location           | name                          |
| DM-19  | Geographic location (latitude)         | Investigation | STUDY                                    | Comment[Study Latitude]                                                                                         | /studies/{studyDbId} | location           | latitude                      |
| DM-20  | Geographic location (longitude)        | Investigation | STUDY                                    | Comment[Study Longitude]                                                                                        | /studies/{studyDbId} | location           | longitude                     |
| DM-21  | Geographic location (altitude)         | Investigation | STUDY                                    | Comment[Study Altitude]                                                                                         | /studies/{studyDbId} | location           | altitude                      |
| DM-22  | Description of the experimental design | Investigation | STUDY DESIGN DESCRIPTORS                 | Comment[Study Design Description]                                                                               | /studies/{studyDbId} | experimentalDesign | description                   |
| DM-23  | Type of experimental design            | Investigation | STUDY DESIGN DESCRIPTORS                 | Study Design Type                                                                                               | /studies/{studyDbId} | experimentalDesign | PUI                           |
| DM-24  | Observation unit level hierarchy       | Investigation | STUDY DESIGN DESCRIPTORS                 | Comment[Observation Unit Level Hierarchy]                                                                       | /studies/{studyDbId} | additionalInfo     | observationUnitLevelHierarchy |
| DM-25  | Observation unit description           | Investigation | STUDY DESIGN DESCRIPTORS                 | Comment[Observation Unit Description]                                                                           | /studies/{studyDbId} | None               | observationUnitsDescription   |
| DM-26  | Description of growth facility         | Investigation | STUDY DESIGN DESCRIPTORS                 | Comment[Description of Growth Facility]                                                                         | /studies/{studyDbId} | growthFacility     | description                   |
| DM-27  | Type of growth facility                | Investigation | STUDY DESIGN DESCRIPTORS                 | Comment[Type of Growth Facility]                                                                                | /studies/{studyDbId} | growthFacility     | PUI                           |
| DM-28  | Cultural practices                     | Investigation | STUDY PROTOCOLS                          | Study Protocol Description (for Growth protocol)                                                                | /studies/{studyDbId} | None               | culturalPractices             |
| DM-29  | Map of experimental design             | Investigation | STUDY DESIGN DESCRIPTORS                 | Comment[Map of Experimental Design]                                                                             | /studies/{studyDbId} | additionalInfo     | mapOfExperimentalDesign       |
| DM-30  | <b>Person</b>                          |               |                                          |                                                                                                                 |                      |                    |                               |
| DM-31  | Person name                            | Investigation | INVESTIGATION CONTACTS / STUDY CONTACTS  | Investigation Person Last Name - First Name - Mid Initials / Study Person Last Name - First Name - Mid Initials | /studies/{studyDbId} | contacts           | name                          |

|       |                                                                |               |                                         |                                                              |                                 |                               |                        |
|-------|----------------------------------------------------------------|---------------|-----------------------------------------|--------------------------------------------------------------|---------------------------------|-------------------------------|------------------------|
| DM-32 | Person email                                                   | Investigation | INVESTIGATION CONTACTS / STUDY CONTACTS | Investigation Person Email / Study Person Email              | /studies/{studyDbId}            | contacts                      | email                  |
| DM-33 | Person ID                                                      | Investigation | INVESTIGATION CONTACTS / STUDY CONTACTS | Comment[Person ID]                                           | /studies/{studyDbId}            | contacts                      | orcid / contactDbId    |
| DM-34 | Person role                                                    | Investigation | INVESTIGATION CONTACTS / STUDY CONTACTS | Investigation Person Roles / Study Person Roles              | /studies/{studyDbId}            | contacts                      | type                   |
| DM-35 | Person affiliation                                             | Investigation | INVESTIGATION CONTACTS / STUDY CONTACTS | Investigation Person Affiliation / Study Person Affiliation  | /studies/{studyDbId}            | contacts                      | instituteName          |
| DM-36 | <b>Data File</b>                                               |               |                                         |                                                              |                                 |                               |                        |
| DM-37 | Data file link                                                 | Investigation | STUDY                                   | Comment[Study Data File Link]                                | /studies/{studyDbId}            | dataLinks                     | type                   |
| DM-38 | Data file description                                          | Investigation | STUDY                                   | Comment[Study Data File Description]                         | /studies/{studyDbId}            | dataLinks                     | name / url             |
| DM-39 | Data file version                                              | Investigation | STUDY                                   | Comment[Study Data File Version]                             | /studies/{studyDbId}            | dataLinks                     | version                |
| DM-40 | <b>Biological Material</b>                                     |               |                                         |                                                              |                                 |                               |                        |
| DM-41 | Biological material ID                                         | Study         | None                                    | Source Name                                                  | /germplasm/{germplasmDbId}      | None                          | accessionNumber        |
| DM-42 | Organism                                                       | Study         | Source                                  | Characteristics[Organism]                                    | /germplasm/{germplasmDbId}      | taxonIds                      | sourceName, taxonId    |
| DM-43 | Genus                                                          | Study         | Source                                  | Characteristics[Genus]                                       | /germplasm/{germplasmDbId}      | None                          | germplasmGenus         |
| DM-44 | Species                                                        | Study         | Source                                  | Characteristics[Species]                                     | /germplasm/{germplasmDbId}      | None                          | germplasmSpecies       |
| DM-44 | Infraspecific name                                             | Study         | Source                                  | Characteristics[Infraspecific Name]                          | /germplasm/{germplasmDbId}      | None                          | subtaxa                |
| DM-45 | Biological material latitude                                   | Study         | Source                                  | Characteristics[Biological Material Latitude]                | /germplasm/{germplasmDbId}      | germplasmOrigin               | latitudeDecimal        |
| DM-46 | Biological material longitude                                  | Study         | Source                                  | Characteristics[Biological Material Longitude]               | /germplasm/{germplasmDbId}      | germplasmOrigin               | longitudeDecimal       |
| DM-47 | Biological material altitude                                   | Study         | Source                                  | Characteristics[Biological Material Altitude]                | /germplasm/{germplasmDbId}      | germplasmOrigin               | altitude               |
| DM-48 | Biological material coordinates uncertainty                    | Study         | Source                                  | Characteristics[Biological Material Coordinates Uncertainty] | /germplasm/{germplasmDbId}      | germplasmOrigin               | coordinateUncertainty  |
| DM-49 | Biological material preprocessing                              | Study         | Source                                  | Characteristics[Biological Material Preprocessing]           | /germplasm/{germplasmDbId}      | None                          | germplasmPreprocessing |
| DM-50 | Material source ID (Holding institute/stock centre, accession) | Study         | Source                                  | Characteristics[Material Source ID]                          | /germplasm/{germplasmDbId}/mcpd | donorInfo                     | donorAccessionNumber   |
| DM-51 | Material source DOI                                            | Study         | Source                                  | Characteristics[Material Source DOI]                         | /germplasm/{germplasmDbId}/mcpd | donorInfo                     | donorAccessionPui      |
| DM-52 | Material source latitude                                       | Study         | Source                                  | Characteristics[Material Source Latitude]                    | /germplasm/{germplasmDbId}/mcpd | collectingInfo.collectingSite | latitudeDecimal        |
| DM-53 | Material source longitude                                      | Study         | Source                                  | Characteristics[Material Source Longitude]                   | /germplasm/{germplasmDbId}/mcpd | collectingInfo.collectingSite | longitudeDecimal       |
| DM-54 | Material source altitude                                       | Study         | Source                                  | Characteristics[Material Source Altitude]                    | /germplasm/{germplasmDbId}/mcpd | collectingInfo.collectingSite | elevation              |
| DM-55 | Material source coordinates uncertainty                        | Study         | Source                                  | Characteristics[Material Source Coordinates Uncertainty]     | /germplasm/{germplasmDbId}/mcpd | collectingInfo.collectingSite | coordinateUncertainty  |
| DM-56 | Material source description                                    | Study         | Source                                  | Characteristics[Material Source Description]                 | /germplasm/{germplasmDbId}      | None                          | seedSourceDescription  |
| DM-57 | <b>Environment</b>                                             |               |                                         |                                                              |                                 |                               |                        |
| DM-58 | Environment parameter                                          | Investigation | STUDY PROTOCOLS                         | Study Protocol Parameters Name (for Growth protocol)         | /studies/{studyDbId}            | environmentParameters         | parameterName          |
| DM-59 | Environment parameter value                                    | Study         | Growth protocol                         | Parameter Value[ ]                                           | /studies/{studyDbId}            | environmentParameters         | description            |
| DM-60 | <b>Experimental Factor</b>                                     |               |                                         |                                                              |                                 |                               |                        |
| DM-61 | Experimental Factor type                                       | Investigation | STUDY FACTORS                           | Study Factor Name                                            | /observationunits               | Treatment                     | Factor                 |
| DM-62 | Experimental Factor description                                | Investigation | STUDY FACTORS                           | Comment[Study Factor Description]                            | None                            | None                          | None                   |
| DM-63 | Experimental Factor values                                     | Investigation | STUDY FACTORS                           | Comment[Study Factor Values]                                 | out of scope                    |                               |                        |
| DM-64 | <b>Event</b>                                                   |               |                                         |                                                              |                                 |                               |                        |
| DM-65 | Event type                                                     | Investigation | STUDY PROTOCOLS                         | Study Protocol Name (for protocol of type Event)             | /events                         | None                          | eventName              |
| DM-66 | Event accession number                                         | Investigation | STUDY PROTOCOLS                         | Study Protocol URI (for protocol of type Event)              | /events                         | None                          | eventDbId              |
| DM-67 | Event description                                              | Investigation | STUDY PROTOCOLS                         | Study Protocol Description (for protocol of type Event)      | /events                         | None                          | description            |
| DM-68 | Event date                                                     | Event file    | None                                    | Event Date                                                   | /events                         | None                          | date                   |
| DM-69 | <b>Observation Unit</b>                                        |               |                                         |                                                              |                                 |                               |                        |
| DM-70 | Observation unit ID                                            | Study / Assay | None                                    | Sample Name                                                  | /observationunits               | None                          | observationUnitDbId    |
| DM-71 | Observation unit type                                          | Study         | Sample                                  | Characteristics[Observation Unit Type]                       | /observationunits               | None                          | observationLevel       |

|       |                                    |                       |                   |                                                    |                   |                     |                                                     |
|-------|------------------------------------|-----------------------|-------------------|----------------------------------------------------|-------------------|---------------------|-----------------------------------------------------|
| DM-72 | External ID                        | Study                 | Sample            | Characteristics[External ID]                       | /observationunits | observationUnitXref | id/source                                           |
| DM-73 | Spatial distribution               | Study                 | Sample            | Characteristics[Spatial distribution]              | /observationunits | None                | observationLevels                                   |
| DM-74 | Observation Unit factor value      | Study                 | Source / Sample   | Factor Value[ ]                                    | /observationunits | treatments          | factor/modality                                     |
| DM-75 | <b>Sample</b>                      |                       |                   |                                                    |                   |                     |                                                     |
| DM-76 | Sample ID                          | Assay                 | None              | Extract Name                                       | /samples          | None                | sampleDbld                                          |
| DM-77 | Plant structure development stage  | Assay                 | Extract           | Characteristics[Plant Structure Development Stage] | /samples          | additionalInfo      | plantStructureDevelopmentStage                      |
| DM-78 | Plant anatomical entity            | Assay                 | Extract           | Characteristics[Plant Anatomical Entity]           | /samples          | None                | tissueType                                          |
| DM-79 | Sample description                 | Assay                 | Sampling protocol | Parameter Value[Sampling Description]              | /samples          | additionalInfo      | samplingDescription                                 |
| DM-80 | Collection date                    | Assay                 | Sampling protocol | Parameter Value[Sampling Date]                     | /samples          | None                | sampleTimestamp                                     |
| DM-81 | External ID                        | Assay                 | Extract           | Characteristics[External ID]                       | /samples          | additionalInfo      | externalId                                          |
| DM-82 | <b>Observed Variable</b>           |                       |                   |                                                    |                   |                     |                                                     |
| DM-83 | Variable ID                        | Trait Definition File | None              | Variable ID                                        | /variables        | None                | observationVariableName                             |
| DM-84 | Variable name                      | Trait Definition File | None              | Variable name                                      | /variables        | None                | observationVariableName,<br>observationVariableDbld |
| DM-85 | Variable accession number          | Trait Definition File | None              | Variable accession number                          | /variables        | None                | xref, (observationVariableDbld)                     |
| DM-86 | Trait                              | Trait Definition File | None              | Trait                                              | /variables        | trait               | traitName, description                              |
| DM-87 | Trait accession number             | Trait Definition File | None              | Trait accession number                             | /variables        | trait               | (traitDbld)                                         |
| DM-88 | Method                             | Trait Definition File | None              | Method                                             | /variables        | method              | methodName                                          |
| DM-89 | Method accession number            | Trait Definition File | None              | Method accession number                            | /variables        | method              | (methodDbld)                                        |
| DM-90 | Method description                 | Trait Definition File | None              | Method description                                 | /variables        | method              | description                                         |
| DM-91 | Reference associated to the method | Trait Definition File | None              | Reference associated to the method                 | /variables        | method              | reference                                           |
| DM-92 | Scale                              | Trait Definition File | None              | Scale                                              | /variables        | scale               | scaleName                                           |
| DM-93 | Scale accession number             | Trait Definition File | None              | Scale accession number                             | /variables        | scale               | (scaleDbld)                                         |
| DM-94 | Time scale                         | Trait Definition File | None              | Time scale                                         | None              | None                | None                                                |
